# Supplementary material for: Concurrent Use of Renal Replacement Therapy during Extracorporeal Membrane Oxygenation Support: A Systematic Review and Meta-Analysis
Source: MDPI journal article supplement (doi:10.3390/jcm10020241), 2021-01-11
Supplement: s1 [file s1]

# SUPPLEMENTARY TABLE

Table S1. Joanna Briggs Institute (JBI) checklist for all studies.

| Cohort study                      | Questions |     |     |     |     |     |     |     |     |     |     | Overall |     |         |
|-----------------------------------|-----------|-----|-----|-----|-----|-----|-----|-----|-----|-----|-----|---------|-----|---------|
| (1st Author, Year)                | 1         | 2   | 3   | 4   | 5   | 6   | 7   | 8   | 9   | 10  | 11  |         |     |         |
| Allyn, 2018 <sup>28</sup>         | Yes       |     |     | Yes | Yes | Yes | Yes |     | Yes |     | Yes | 7       |     |         |
| Antonucci, 2016 <sup>29</sup>     | Yes       | Yes | Yes | Yes | Yes | Yes | Yes |     | Yes |     | Yes | 9       |     |         |
| Baek, 2016 <sup>30</sup>          | Yes       |     | Yes |     |     | Yes | Yes | Yes | Yes |     | Yes | 7       |     |         |
| Chen, 2019 <sup>31</sup>          | Yes       | Yes | Yes | Yes | Yes | Yes | Yes | Yes | Yes | Yes | Yes | 11      |     |         |
| Combes, 2008 <sup>32</sup>        | Yes       |     |     | Yes | Yes | Yes | Yes |     | Yes |     | Yes | 7       |     |         |
| Dado, 2020 <sup>33</sup>          | Yes       | Yes | Yes | Yes | Yes | Yes | Yes |     | Yes |     | Yes | 9       |     |         |
| Deatrick, 2020 <sup>34</sup>      | Yes       | Yes | Yes | Yes | Yes | Yes | Yes | Yes | Yes |     | Yes | 10      |     |         |
| Devasagayaraj, 2018 <sup>35</sup> | Yes       | Yes | Yes |     |     | Yes | Yes |     | Yes |     | Yes | 7       |     |         |
| Elsharkawy, 2010 <sup>36</sup>    | Yes       |     |     | Yes | Yes | Yes | Yes |     | Yes |     | Yes | 7       |     |         |
| Fong, 2020 <sup>37</sup>          | Yes       | Yes | Yes | Yes | Yes | Yes | Yes | Yes | Yes |     | Yes | 10      |     |         |
| Haneya, 2015 <sup>38</sup>        | Yes       | Yes | Yes | Yes | Yes | Yes | Yes |     | Yes |     | Yes | 9       |     |         |
| He, 2018 <sup>39</sup>            | Yes       | Yes | Yes | Yes | Yes | Yes | Yes |     | Yes |     | Yes | 9       |     |         |
| Kielstein, 2013 <sup>40</sup>     | Yes       | Yes | Yes | Yes | Yes | Yes | Yes |     | Yes |     | Yes | 9       |     |         |
| Lee SY, 2020 <sup>41</sup>        | Yes       |     |     | Yes | Yes | Yes | Yes | Yes | Yes |     | Yes | 8       |     |         |
| Luo, 2009 <sup>42</sup>           | Yes       |     | Yes | Yes | Yes | Yes | Yes | Yes | Yes | Yes | Yes | 10      |     |         |
| McCanny, 2019 <sup>43</sup>       | Yes       | Yes | Yes | Yes | Yes | Yes | Yes | Yes | Yes |     | Yes | 10      |     |         |
| Paek, 2018 <sup>44</sup>          | Yes       | Yes | Yes | Yes | Yes | Yes | Yes | Yes | Yes | Yes | Yes | 11      |     |         |
| Panholzer, 2017 <sup>45</sup>     | Yes       | Yes | Yes |     |     | Yes | Yes |     | Yes |     | Yes | 7       |     |         |
| Schmidt, 2014 <sup>46</sup>       | Yes       | Yes | Yes | Yes | Yes | Yes | Yes | Yes | Yes |     | Yes | 10      |     |         |
| Thajudeen, 2015 <sup>47</sup>     | Yes       |     | Yes | Yes | Yes | Yes | Yes | Yes | Yes | Yes | Yes | 10      |     |         |
| Unosawa, 2013 <sup>48</sup>       | Yes       |     |     | Yes | Yes | Yes | Yes |     | Yes |     | Yes | 7       |     |         |
| Xie, 2020 <sup>49</sup>           | Yes       |     |     | Yes | Yes | Yes | Yes | Yes | Yes |     | Yes | 8       |     |         |
| Yan, 2010 <sup>50</sup>           | Yes       | Yes | Yes | Yes | Yes | Yes | Yes | Yes | Yes |     | Yes | 10      |     |         |
|                                   |           |     |     |     |     |     |     |     |     |     |     |         |     |         |
| Case-control Study                | Questions |     |     |     |     |     |     |     |     |     |     | Overall |     |         |
| (1st Author, Year)                | 1         | 2   | 3   | 4   | 5   | 6   | 7   | 8   | 9   | 10  |     |         |     |         |
| Yap, 2003 <sup>51</sup>           | Yes       |     |     | Yes | Yes |     |     | Yes | Yes | Yes |     | 6       |     |         |
|                                   |           |     |     |     |     |     |     |     |     |     |     |         |     |         |
| RCT                               | Questions |     |     |     |     |     |     |     |     |     |     |         |     | Overall |
| (1st Author, Year)                | 1         | 2   | 3   | 4   | 5   | 6   | 7   | 8   | 9   | 10  | 11  | 12      | 13  |         |
| Li, 2019 <sup>52</sup>            | Yes       | Yes | Yes |     |     |     | Yes | Yes | Yes | Yes | Yes | Yes     | Yes | 10      |

## SUPPLEMENTARY FIGURES

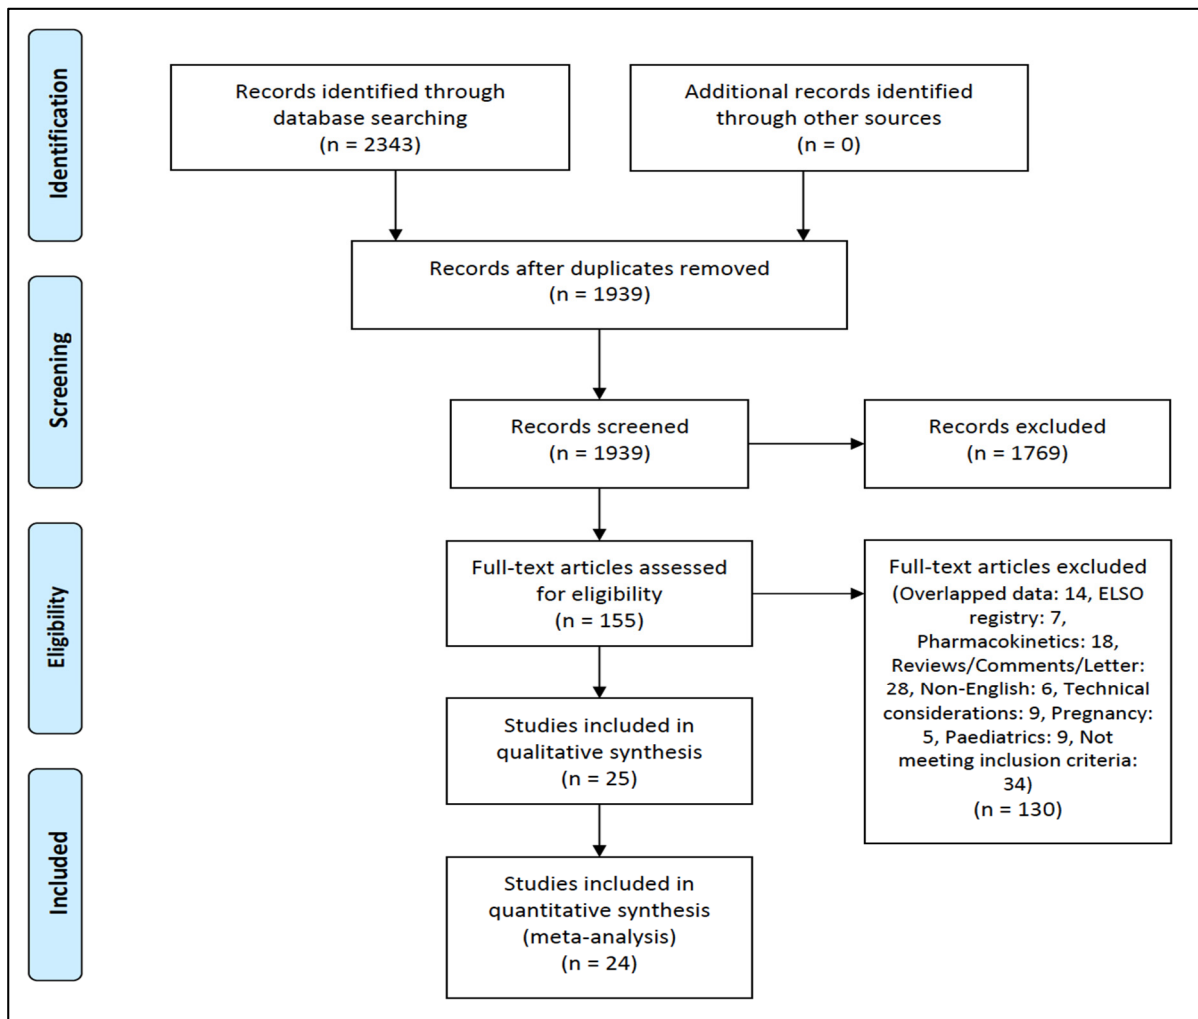

Figure S1. Preferred Reporting Items for Systematic Review and Meta-analyses (PRISMA) flowchart for study selection.

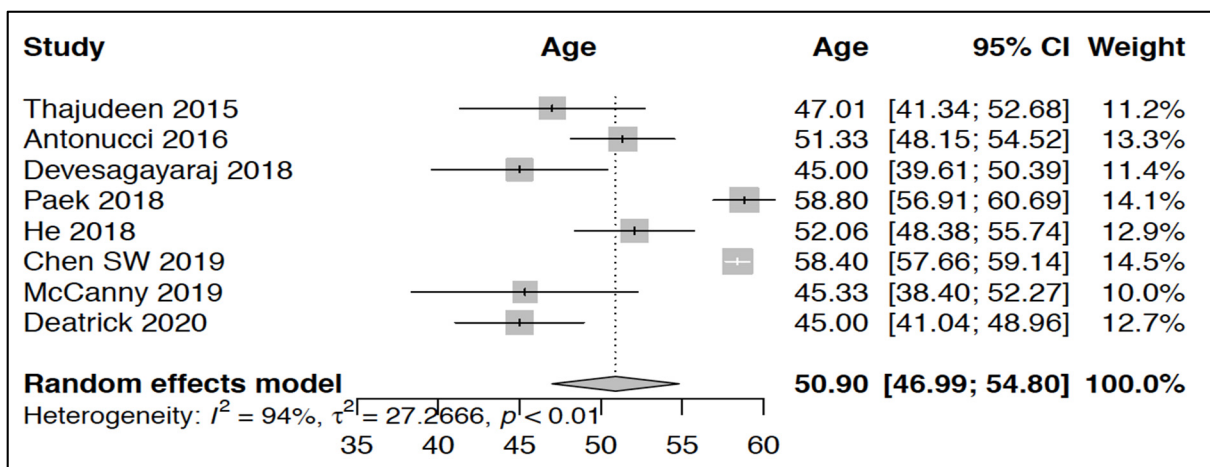

Figure S2. Forest plot showing pooled mean age.

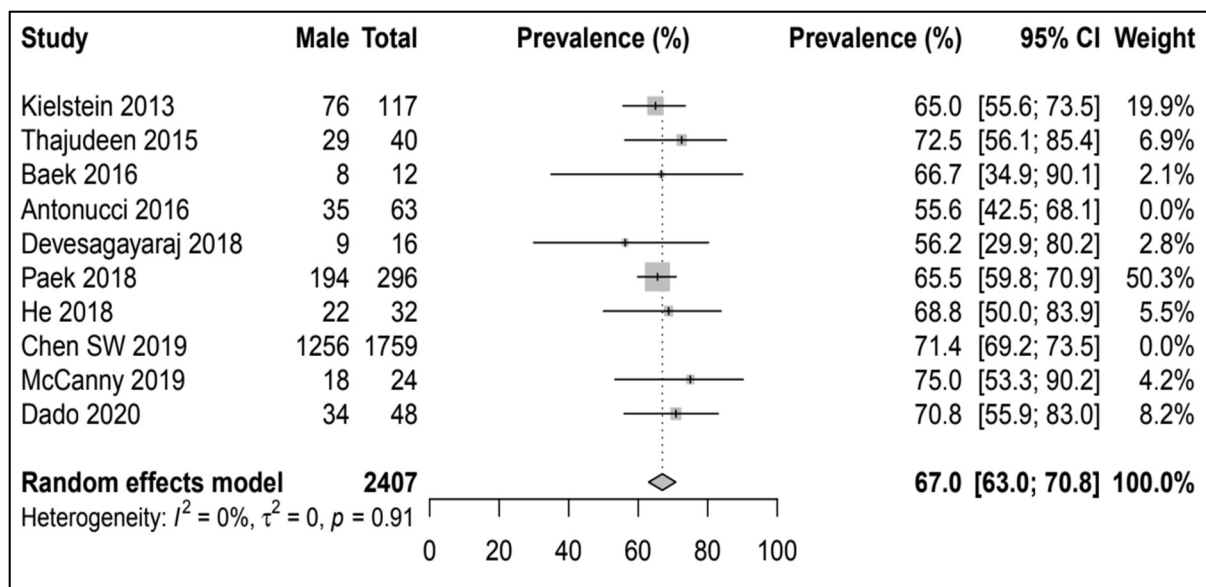

Figure S3. Forest plot showing pooled proportions of males.

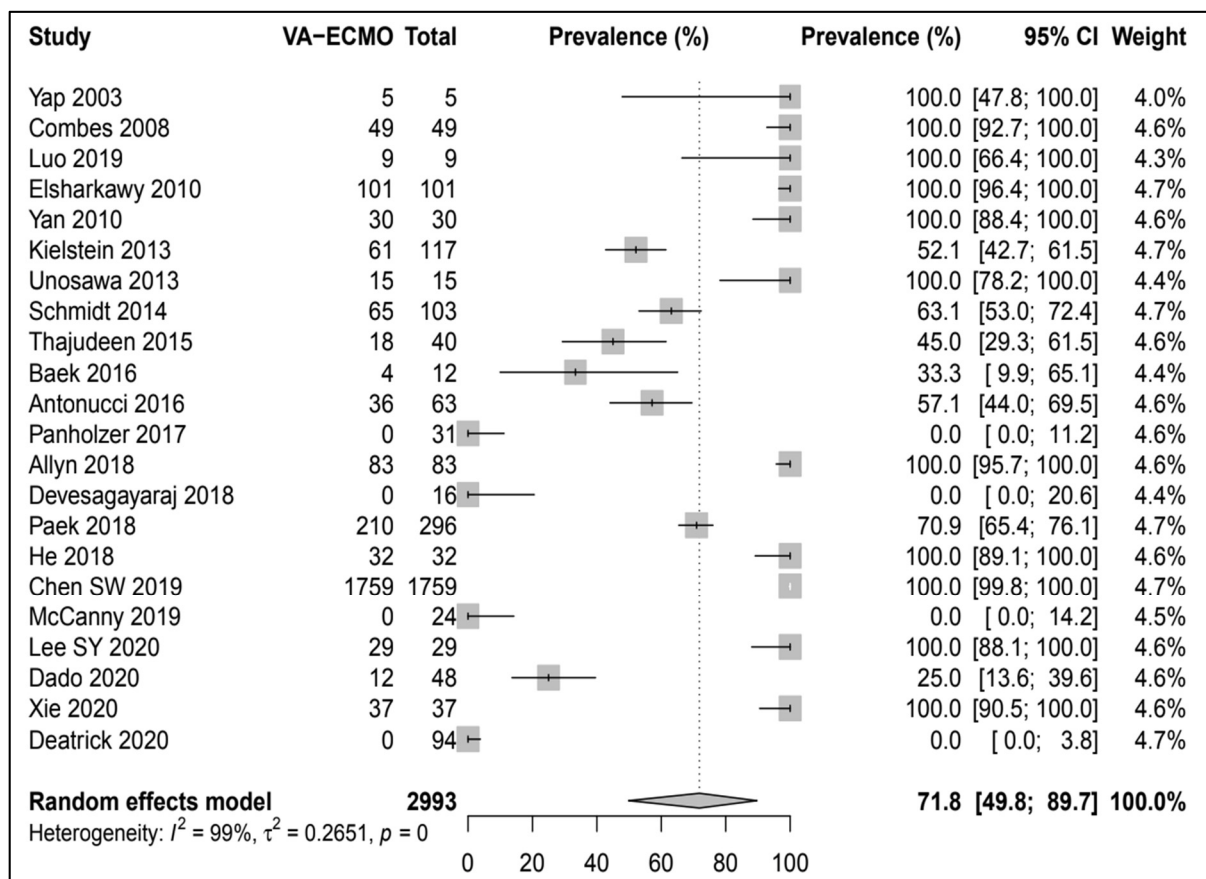

Figure S4. Forest plot showing pooled proportions of concurrent VA ECMO and RRT use.

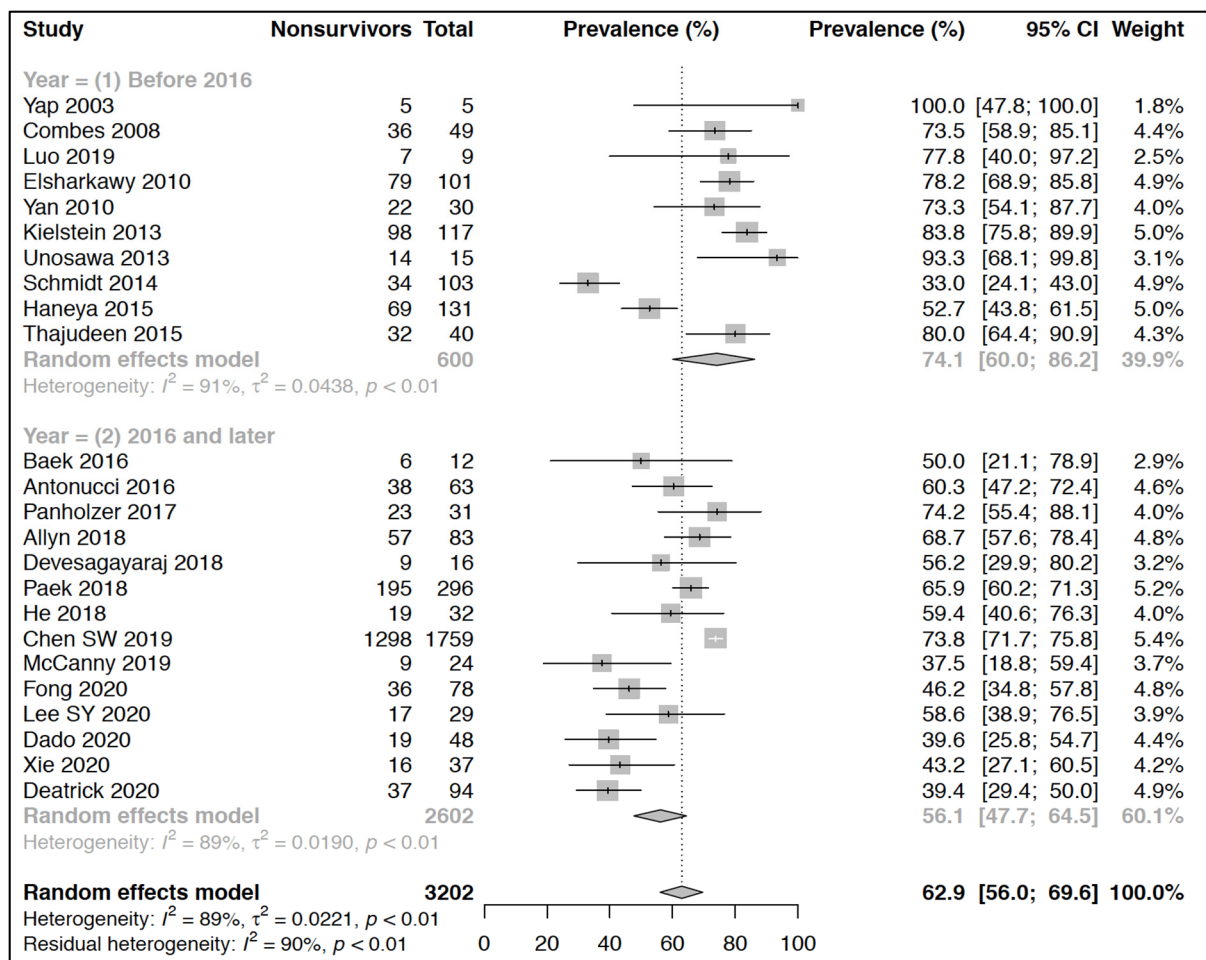

Figure S5. Forest plot showing pooled mortality before and after 2016.

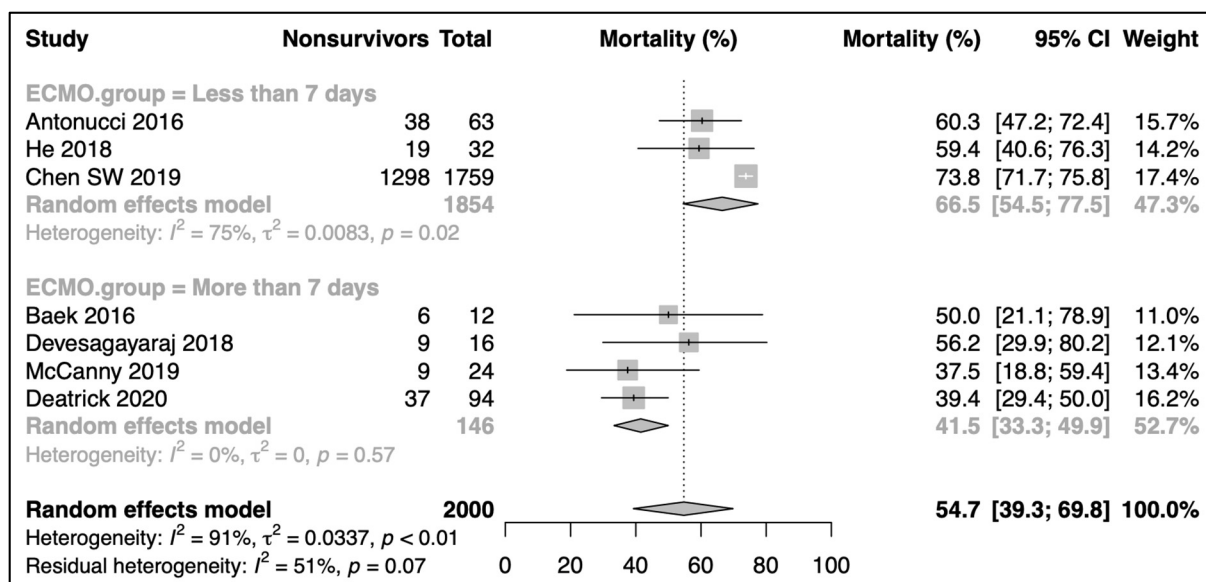

Figure S6. Forest plot showing pooled mortality based on ECMO duration (more and less than 7 days).
